# Supplementary material for: Salinity effects on water potential and the normalized difference vegetation index in four species of a saline semi-arid ecosystem
Source: PeerJ. 2021 Oct 25;9:e12297. doi: 10.7717/peerj.12297 (PMC8552789; doi:10.7717/peerj.12297)
Supplement: Supplemental Information 1 [file peerj-09-12297-s001.xlsx]

## Sheet: climate variables
		Jan	Feb	Mar	Apr	May	Jun	Jul	Aug	Sep	Oct	Nov	Dec	PROMEDIO
	Temperature	16.1	16.1	18.6	21.1	22.4	27.5	30.3	30.2	28.1	25.5	22.2	17.1	23
	TMAX	28.1	30.2	32.4	36.2	33.7	40.4	39	39.4	37.5	37.9	33.4	29.3	40.4
	TMIN	3.5	4.3	7.3	8.1	11.5	14.3	21	23	18.7	13.5	11.9	4.9	3.5
	Relative Humidity	74	70.6	66.9	67.3	64.3	66.8	69.4	75.8	82.5	74.1	75.7	76.5	72
	HR MAX	100	100	99.6	100	100	99.7	95.8	100	100	100	100	100	100
	HR MIN	18.6	25.1	22.3	16.7	21.6	14.5	17.5	39.4	28.7	23	24.4	16.8	14.5
	Precipitation	8	5.5	7.3	0.2	0.1	0	4.8	143.3	146.6	24.4	58.7	20.5	419.4
	VV	4.8	3.9	3.6	2.2	2.4	5.4	5.7	4.4	2.2	1.2	2.2	2.2	2
	DV	335.2	325.7	320.1	262	271.4	219.8	207.4	204.5	205.6	287	223	326.7	258.8
	RV MAX	44.4	49.3	46.3	51.9	46.7	48.6	63.1	56.8	69.9	39.5	61.2	47.3	69.9
	RV PROM	14	12.3	12.6	11.9	11	14.4	15.2	14	11.2	9.6	11.9	9.7	12.3

## Sheet: soil characteristics
	N		P		K		Mg		Ca		Na					EC		sand		Silt		clay		pH		OM		Sat		CaCO3
	0-30cm	30-60 cm	0-30cm	30-60 cm	0-30cm	30-60 cm	0-30cm	30-60 cm	0-30cm	30-60 cm	0-30cm	30-60 cm				0-30cm	30-60 cm	0-30cm	30-60 cm	0-30cm	30-60 cm	0-30cm	30-60 cm	0-30cm	31-60 cm	0-30cm	30-60 cm	0-30cm	30-60 cm	0-30cm	30-60 cm
1	1.8	0.5	0	0	3.5	2.5	4.4	3.1	2.2	1.6	18	15			1	11.1	2.7	49	45	37	34	13	17	7	7.5	0	0	43	36	2	1
2	1.7	0.5	0	0	3.4	2.4	4.3	3	2.1	1.7	17	14.2			2	10	2.9	49	47	36	35	12	17.5	7.8	7.8	0	0	41	37	1.8	2
3	1.7	0.7	0	0	3.3	2.2	4.1	2.5	2.1	1.9	18	16.3			3	11	2.5	50	46	36	35	13	17	7.6	7.3	0	0	41	38	1.9	2
4	1.75	0.73	0	0	3.2	2.2	4.1	2.7	2.1	1.9	19	15.2			4	10	2.9	49.44	48	37	35.5	13	18	7.5	7.4	0.1	0.1	40	38	1.7	1
5	2	0.75	0.1	0	3.3	2.2	4.1	2.6	1.9	1.7	19	17			5	9.8	3.1	49	48	37	37	12	16	7.5	8.5	0	0.1	39	38.5	2	2
6	1.8	0.8	0	0.05	3.4	2.2	4.2	2.8	2.4	1.8	16	16			6	0.7	3	50	48	36	36	13.5	17	7.8	8.8	0.2	0	38	38	2.1	2
7	1.8	0.85	0	0	3.3	2.1	4.3	3.1	2.3	1.8	16	16			7	7.6	3.2	49	46	37	35	14	17	7.2	8.7	0	0	38	38.2	2.2	2
8	1.65	1	0	0	3.15	1.6	4.4	3	2.3	2	16	16.3			8	7.8	3.2	50	46	37.5	36	13	17.5	7.8	8	0	0	41	37	2.4	2
9	1.8	1.3	0	0	3.3	2.1	4.4	2.8	2.2	2	15.9	16.7			9	6.9	5.3	49	48	38	38	12.5	16.5	8.1	8	0	0	40	37	2	2
															10	8.1	1.8	51	48	37	35.5	13	16	7.6	7.5	0.2	0.1	40	38	2	2
															11	8.2	5.3	48.9	47	36	35.5	13	18	8	7.5	0.12	0.1	35	36	2	1
															12	8.8	5.1	49	48	38	37	15	18	8	8	0.1	0	44	36	1.9	2
															13	7.9	5.2	50	48	38	35	16	17.5	8	7.2	0.1	0	43	36	2	1
															14	7.2	3	49.9	48	37	35	14	17.5	8.1	7.8	0	0	43	36.5	2	2
															15	7.5	2.8	49	48	37	35	15	17	8	8.2	0.1	0	42	36	2	2
															16	7.8	2.1	49	47	37	35.5	15	17	8.3	7.6	0	0	43	37	2	2
															17	8.4	2.1	49	47	37	35	16	17	7.8	7.9	0.1	0	44	36	2	3
															18	8.7	2.1	49.7	47	36	35	16	15.5	7.8	7.5	0.3	0.1	43	38	2	2.5
															19	8.6	2	49	48	36	35	15	18	8.1	7.9	0.2	0.1	43	37.5	2	2
															20	8.6	1.8	50	46.5	36	36	14	18	8	8.2	0	0.1	43	36	2	2
															21	9.2	3	50	46	36	35	14	17	8	8	0	0.1	44	37	2	2
															22	7.6	2.2	49	48	36	37	14	17	8.5	8.2	0	0.1	43	36	2	2
															23	5.6	3.1	49.7	48	36	37	14	16.5	8.2	8.1	0	0	43	37	2	2
															24	7.2	2.9	49	48	36	35	13	17	8.2	7.8	0.1	0	42	37	2	2

## Sheet: Database  water potential
	Species	Organs	Repetition	Mean water potential
1	Bursera fagaroides	Root	1	-5
2	Bursera fagaroides	Root	2	-5.1
3	Bursera fagaroides	Root	3	-5.2
4	Bursera fagaroides	Stem	1	-6.4
5	Bursera fagaroides	Stem	2	-6.5
6	Bursera fagaroides	Stem	3	-6.4
7	Bursera fagaroides	Leaves	1	-6.7
8	Bursera fagaroides	Leaves	2	-6.8
9	Bursera fagaroides	Leaves	3	-5.4
10	Parkinsonia Aculeata	Root	1	-3.9
11	Parkinsonia Aculeata	Root	2	-3.8
12	Parkinsonia Aculeata	Root	3	-3.9
13	Parkinsonia Aculeata	Stem	1	-4.1
14	Parkinsonia Aculeata	Stem	2	-4.1
15	Parkinsonia Aculeata	Stem	3	-4
16	Parkinsonia Aculeata	Leaves	1	-4.3
17	Parkinsonia Aculeata	Leaves	2	-4.5
18	Parkinsonia Aculeata	Leaves	3	-4.5
19	Prosopis laevigata	Root	1	-1.3
20	Prosopis laevigata	Root	2	-1.3
21	Prosopis laevigata	Root	3	-1.2
22	Prosopis laevigata	Stem	1	-1.7
23	Prosopis laevigata	Stem	2	-1.8
24	Prosopis laevigata	Stem	3	-1.8
25	Prosopis laevigata	Leaves	1	-1.9
26	Prosopis laevigata	Leaves	2	-1.8
27	Prosopis laevigata	Leaves	3	-1.8
28	Atriplex canescens	Root	1	-4.7
29	Atriplex canescens	Root	2	-4.6
30	Atriplex canescens	Root	3	-4.7
31	Atriplex canescens	Stem	1	-5.3
32	Atriplex canescens	Stem	2	-5.3
33	Atriplex canescens	Stem	3	-5.3
34	Atriplex canescens	Leaves	1	-5.7
35	Atriplex canescens	Leaves	2	-5.7
36	Atriplex canescens	Leaves	3	-5.8

## Sheet: Daily water potential
			Species	03:00:00	06:00:00	10:00:00	12:00:00	15:00:00	18:00:00	21:00:00	23:00:00
			Bursera fagaroides	-5.6	-6.1	-6.7	-7.2	-7.7	-7.4	-6.3	-6.1
			Parkinsonia Aculeata	-3.2	-3.2	-3.4	-3.5	-4.4	-4.5	-3.1	-3
			Prosopis laevigata	-1.1	-1.3	-1.5	-1.8	-1.7	-1.6	-1.3	-1
			Atriplex canescens	-4.3	-4.4	-5.6	-5.7	-5.8	-5.8	-4.8	-4.3

## Sheet: Stress intensity
	foliar								-5.0875
Species	03:00:00	06:00:00	10:00:00	12:00:00	15:00:00	18:00:00	21:00:00	23:00:00			Hours	SI	39	Sum	X10-21		SI
Bursera fagaroides	-5.6	-6.1	-6.7	-7.2	-7.7	-7.4	-6.3	-6.1	2.1	-6.6375	11	18.98	53	-5.93333	-7.06	-0.189888	18.9888
Parkinsonia Aculeata	-3.2	-3.2	-3.4	-3.5	-4.4	-4.5	-3.1	-3	1.3	-3.5375	8	20.6383	47	-3.13333	-3.78	-0.206383	20.6383
Prosopis laevigata	-1.1	-1.3	-1.5	-1.8	-1.7	-1.6	-1.3	-1	0.7	-1.4125	11	39.4118	34	-1.13333	-1.58	-0.394118	39.4118
Atriplex canescens	-4.3	-4.4	-5.6	-5.7	-5.8	-5.8	-4.8	-4.3	1.5	-4.35556	11	27.8462	37	-4.33333	-5.54	-0.278462	27.8462
												26.7191	42

## Sheet: NDVI
Species	Jan	Feb	Mar	Apr	May	Jun	Jul	Aug	Sep	Oct	Nov	Dec
Bursera fagaroides	0.43	0.43	0.47	0.54	0.57	0.59	0.62	0.64	0.65	0.61	0.5	0.45
Parkinsonia Aculeata	0.43	0.48	0.57	0.64	0.69	0.75	0.76	0.79	0.77	0.71	0.56	0.44
Prosopis laevigata	0.41	0.47	0.53	0.63	0.7	0.74	0.74	0.76	0.76	0.7	0.61	0.47
Atriplex canescens	0.39	0.39	0.41	0.43	0.47	0.52	0.56	0.56	0.53	0.49	0.45	0.42
